# Supplementary material for: Insulin-Like Growth Factor 2 mRNA-Binding Protein 1 (IGF2BP1) Is a Prognostic Biomarker and Associated with Chemotherapy Responsiveness in Colorectal Cancer
Source: MDPI journal article supplement (doi:10.3390/ijms22136940), 2021-06-28
Supplement: s1 [file s1]

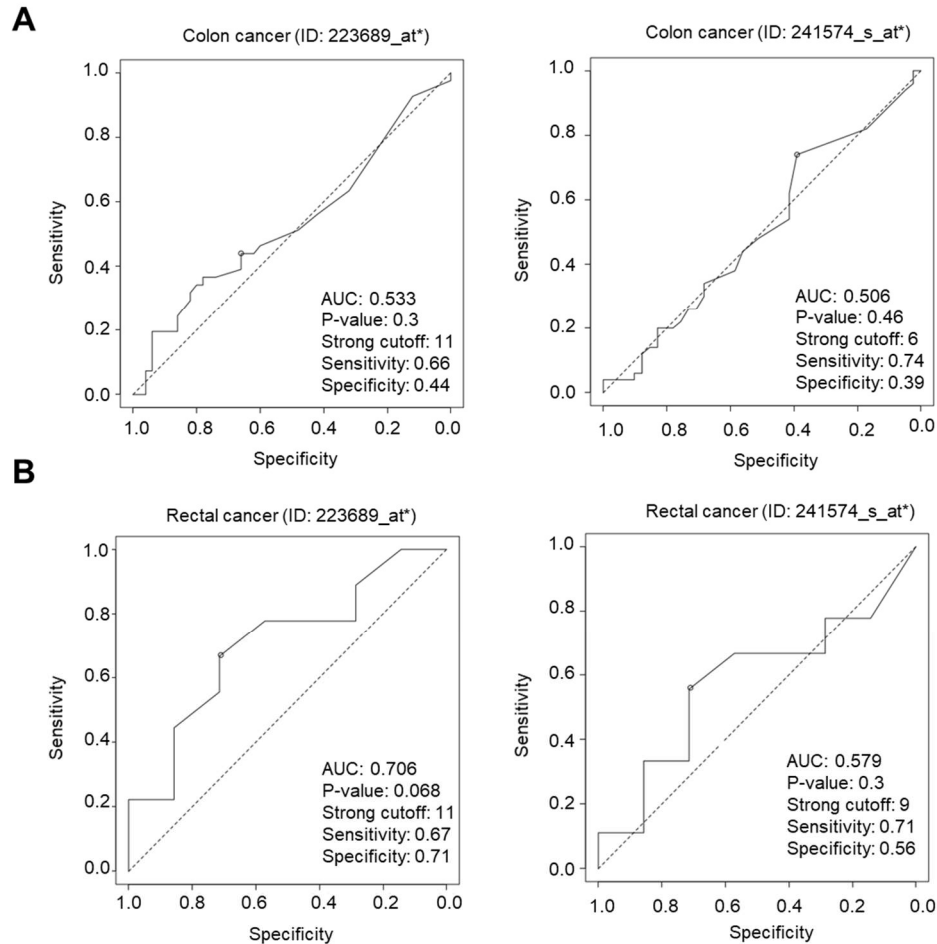

**Supplementary figure 1: Examining roles of IGF2BP1 on the classification of responders and non-responders to chemotherapy in CRC patients.** (A) The receiver operating characteristic (ROC) plot showed the sensitivity and specificity of IGF2BP1 expression (left panel: probe identify: 223689\_at\*; right panel: probe 241574\_s\_at\*) for classifying chemotherapy responsiveness at the strong cutoffs in 91 colon cancer patients. AUC: area under curve. (B) The ROC plot showed the sensitivity and specificity of IGF2BP1 expression (left panel: probe identify: 223689\_at\*; right panel: probe 241574\_s\_at\*) for classifying chemotherapy responsiveness at the strong cutoffs in 16 rectal cancer patients. AUC: area under curve.

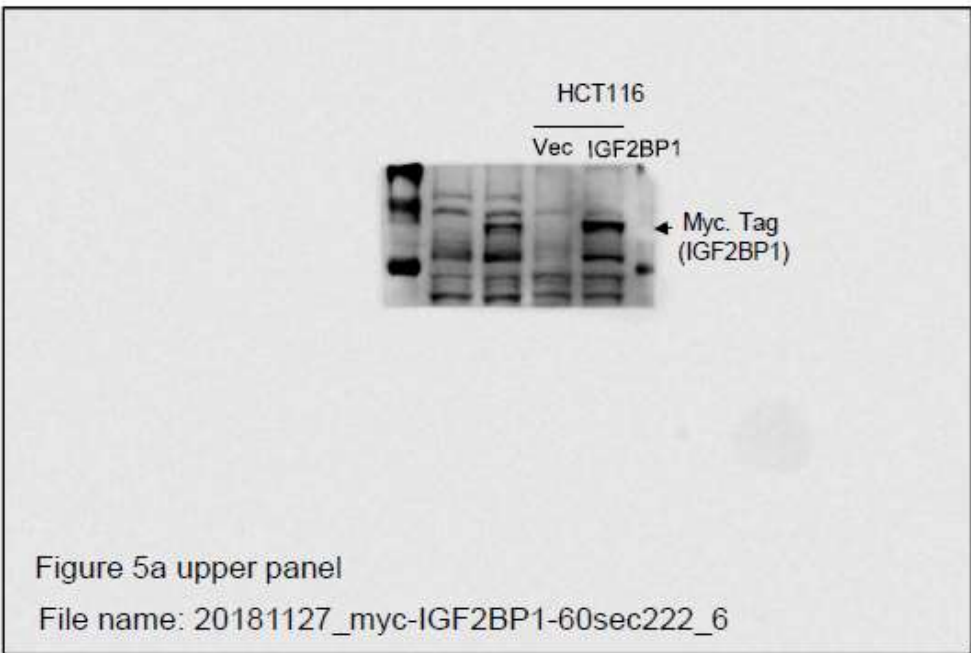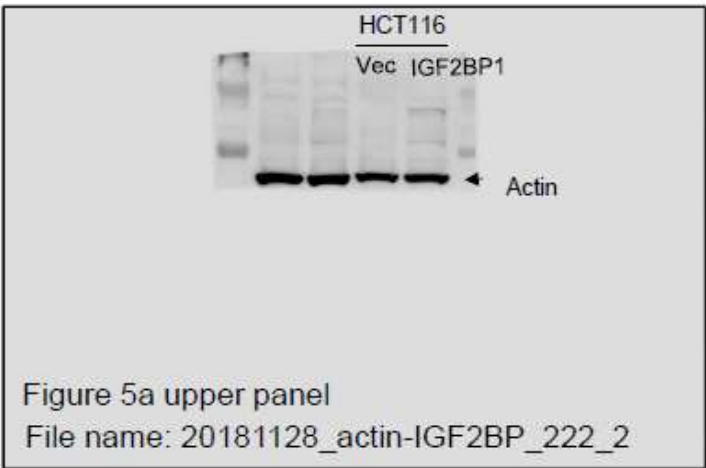

**Supplementary figure 2: The uncropped blots.**
